# Supplementary material for: Interaction of microtubule depolymerizing agent indanocine with different human αβ tubulin isotypes
Source: PubMed Central journal article supplement (PMC5870988; doi:10.1371/journal.pone.0194934), 2018-03-27
Supplement: pone.0194934.s002.pdf [file pone.0194934.s002.pdf]

# Ramachandran Plot

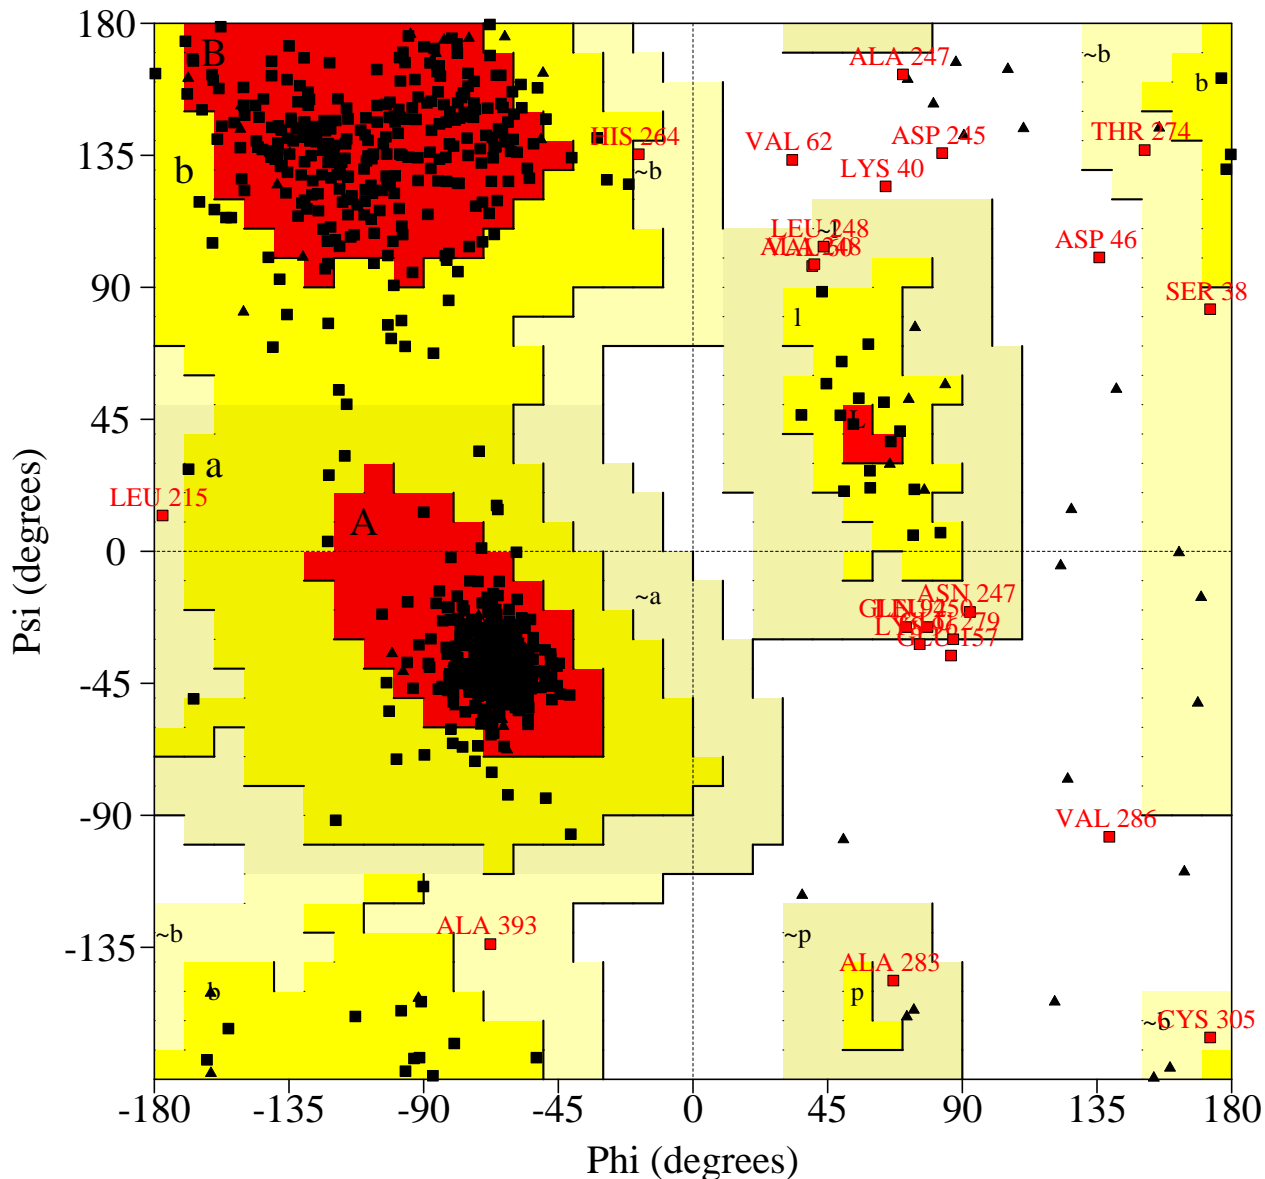

### Plot statistics

|                                                          |     |        |
|----------------------------------------------------------|-----|--------|
| Residues in most favoured regions [A,B,L]                | 680 | 87.2%  |
| Residues in additional allowed regions [a,b,l,p]         | 78  | 10.0%  |
| Residues in generously allowed regions [-~a,-~b,-~l,-~p] | 14  | 1.8%   |
| Residues in disallowed regions                           | 8   | 1.0%   |
| -----                                                    |     |        |
| Number of non-glycine and non-proline residues           | 780 | 100.0% |
| Number of end-residues (excl. Gly and Pro)               | 4   |        |
| Number of glycine residues (shown as triangles)          | 72  |        |
| Number of proline residues                               | 40  |        |
| -----                                                    |     |        |
| Total number of residues                                 | 896 |        |

Based on an analysis of 118 structures of resolution of at least 2.0 Angstroms and R-factor no greater than 20%, a good quality model would be expected to have over 90% in the most favoured regions.
