# Supplementary material for: Interaction of microtubule depolymerizing agent indanocine with different human αβ tubulin isotypes
Source: PubMed Central journal article supplement (PMC5870988; doi:10.1371/journal.pone.0194934), 2018-03-27
Supplement: pone.0194934.s008.pdf [file pone.0194934.s008.pdf]

# Ramachandran Plot

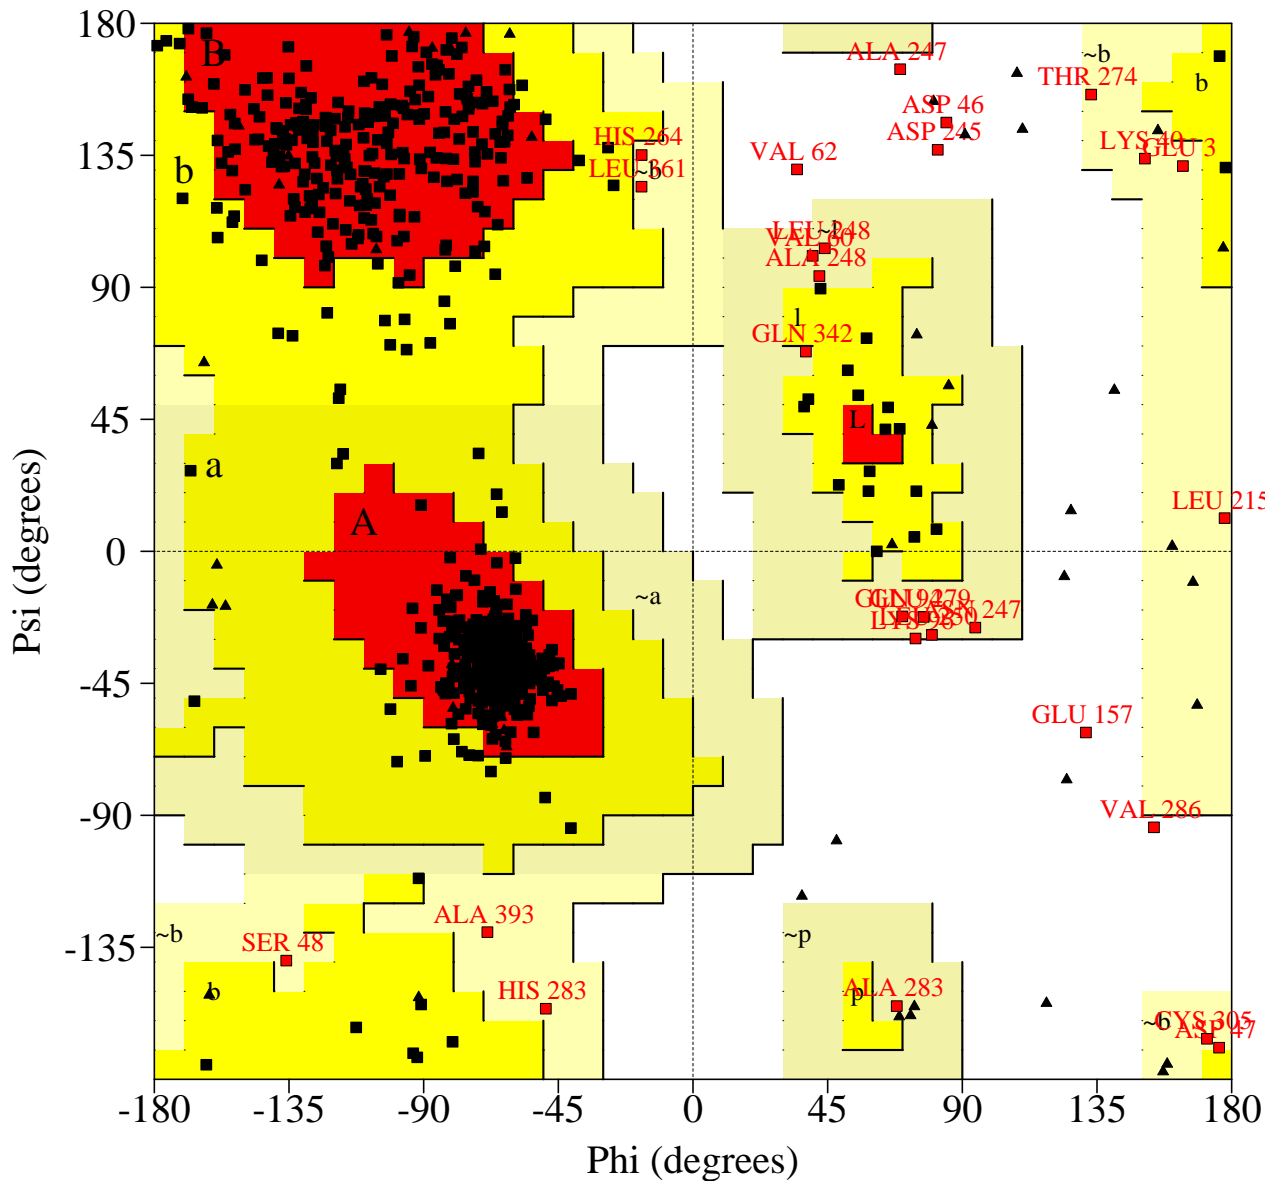

### Plot statistics

|                                                      |     |        |
|------------------------------------------------------|-----|--------|
| Residues in most favoured regions [A,B,L]            | 657 | 87.0%  |
| Residues in additional allowed regions [a,b,l,p]     | 71  | 9.4%   |
| Residues in generously allowed regions [-a,-b,-l,-p] | 21  | 2.8%   |
| Residues in disallowed regions                       | 6   | 0.8%   |
| -----                                                |     |        |
| Number of non-glycine and non-proline residues       | 755 | 100.0% |
| Number of end-residues (excl. Gly and Pro)           | 8   |        |
| Number of glycine residues (shown as triangles)      | 68  |        |
| Number of proline residues                           | 40  |        |
| -----                                                |     |        |
| Total number of residues                             | 871 |        |

Based on an analysis of 118 structures of resolution of at least 2.0 Angstroms and R-factor no greater than 20%, a good quality model would be expected to have over 90% in the most favoured regions.
