# Supplementary material for: Interaction of microtubule depolymerizing agent indanocine with different human αβ tubulin isotypes
Source: PLoS One. 2018 Mar 27;13(3):e0194934. doi: 10.1371/journal.pone.0194934 (PMC5870988; doi:10.1371/journal.pone.0194934)
Supplement: S4 Fig — (PDF) [file pone.0194934.s005.pdf]

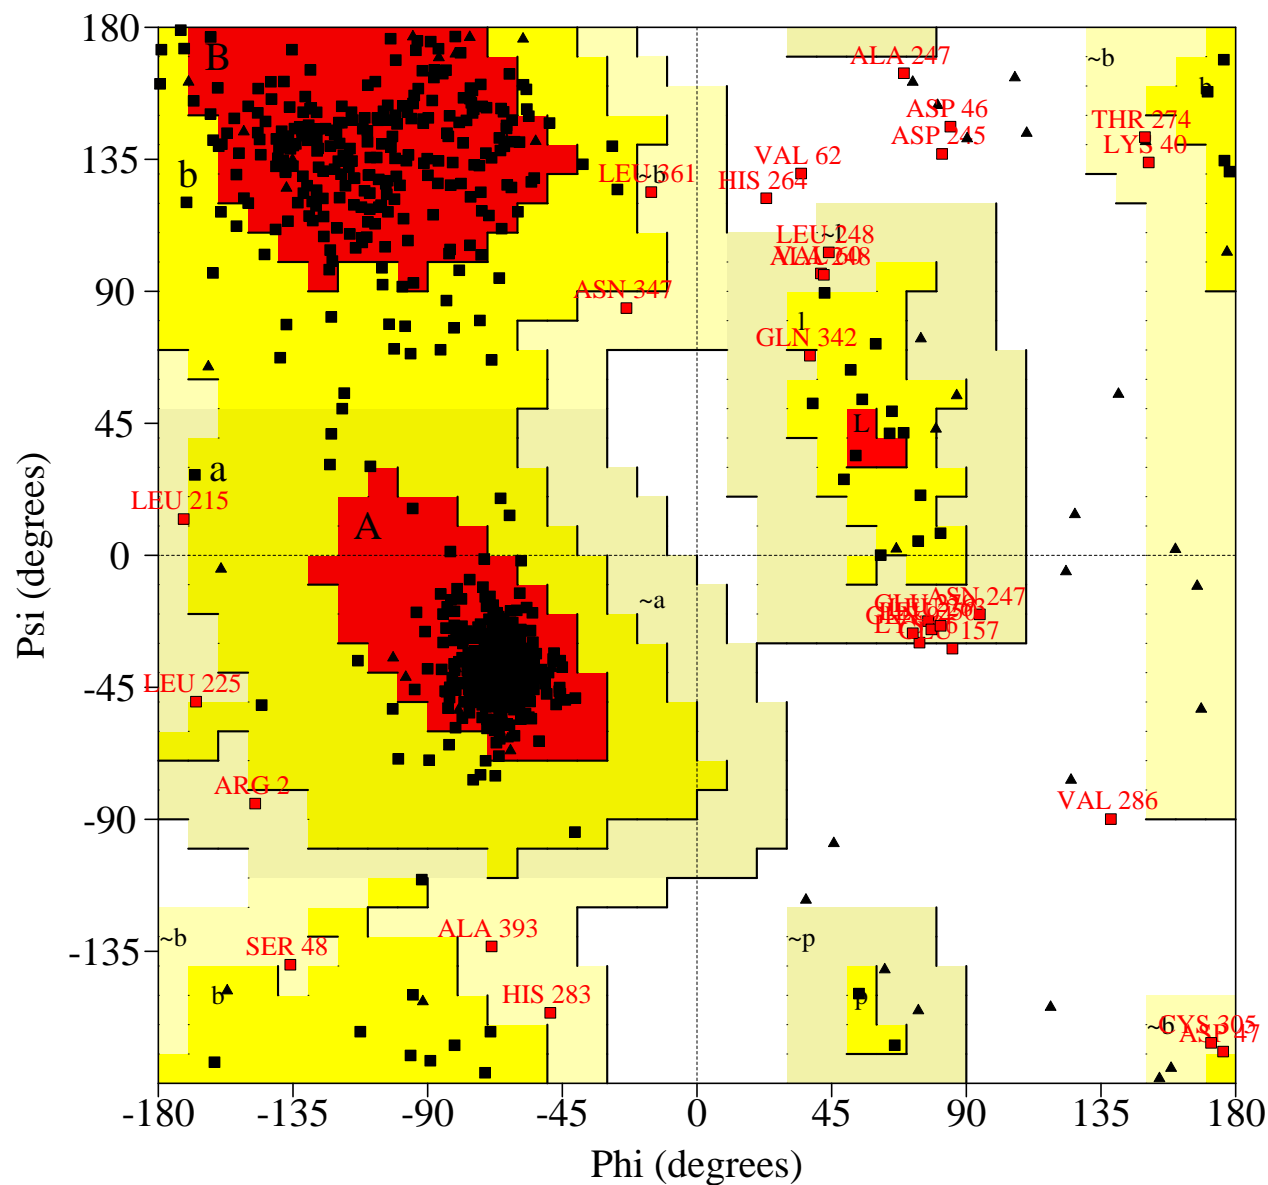

## Plot statistics

|                                                      |      |        |
|------------------------------------------------------|------|--------|
| Residues in most favoured regions [A,B,L]            | 654  | 86.2%  |
| Residues in additional allowed regions [a,b,l,p]     | 76   | 10.0%  |
| Residues in generously allowed regions [~a,~b,~l,~p] | 22   | 2.9%   |
| Residues in disallowed regions                       | 7    | 0.9%   |
|                                                      | ---- | -----  |
| Number of non-glycine and non-proline residues       | 759  | 100.0% |
| Number of end-residues (excl. Gly and Pro)           | 4    |        |
| Number of glycine residues (shown as triangles)      | 66   |        |
| Number of proline residues                           | 39   |        |
|                                                      | ---- |        |
| Total number of residues                             | 868  |        |

Based on an analysis of 118 structures of resolution of at least 2.0 Angstroms and R-factor no greater than 20%, a good quality model would be expected to have over 90% in the most favoured regions.
